# Supplementary material
Source: ML conference proceedings conference paper supplement (https://proceedings.neurips.cc/paper_files/paper/2020/hash/0a4dc6dae338c9cb08947c07581f77a2-Abstract.html)
Supplement: Supplementary file [file 0a4dc6dae338c9cb08947c07581f77a2-Supplemental.pdf]

## A Proofs

### A.1 Learning $\mathcal{D}_{\text{mat}}$ -random networks is harder than $\text{SCAT}_{n^d}^A(\mathcal{D}_{\text{mat}})$

**Theorem A.1.** *Let  $\mathcal{D}_{\text{mat}}$  be a distribution over matrices. Assume that there is an algorithm that learns  $\mathcal{D}_{\text{mat}}$ -random neural networks where the distribution  $\mathcal{D}$  is supported on  $A \subseteq \mathbb{R}^n$ . Then, there is a fixed  $d$  and an efficient algorithm that solves  $\text{SCAT}_{n^d}^A(\mathcal{D}_{\text{mat}})$ .*

*Proof.* Let  $\mathcal{L}$  be an efficient learning algorithm that learns  $\mathcal{D}_{\text{mat}}$ -random neural networks where the distribution  $\mathcal{D}$  is supported on  $A$ . Let  $m(n)$  be such that  $\mathcal{L}$  uses a sample of size at most  $m(n)$ . Let  $p(n) = 9m(n) + n$ . Let  $S = \{(\mathbf{x}_i, y_i)\}_{i=1}^{p(n)} \in (\mathbb{R}^n \times \{0, 1\})^{p(n)}$  be a sample that is contained in  $A$ . We will show an efficient algorithm  $\mathcal{A}$  that distinguishes whether  $S$  is scattered or  $\mathcal{D}_{\text{mat}}$ -realizable. This implies that the theorem holds for  $d$  such that  $n^d \geq p(n)$ .

Given  $S$ , the algorithm  $\mathcal{A}$  learns a function  $h : \mathbb{R}^n \rightarrow \mathbb{R}$  by running  $\mathcal{L}$  with an examples oracle that generates examples by choosing a random (uniformly distributed) example  $(\mathbf{x}_i, y_i) \in S$ . We denote  $\ell_S(h) = \frac{1}{p(n)} \sum_{i \in [p(n)]} (h(\mathbf{x}_i) - y_i)^2$ . Now, if  $\ell_S(h) \leq \frac{1}{10}$ , then  $\mathcal{A}$  returns that  $S$  is  $\mathcal{D}_{\text{mat}}$ -realizable, and otherwise it returns that it is scattered. Clearly, the algorithm  $\mathcal{A}$  runs in polynomial time. We now show that if  $S$  is  $\mathcal{D}_{\text{mat}}$ -realizable then  $\mathcal{A}$  recognizes it with probability at least  $\frac{3}{4}$ , and that if  $S$  is scattered then it also recognizes it with probability at least  $\frac{3}{4}$ .

Assume first that  $S$  is  $\mathcal{D}_{\text{mat}}$ -realizable. Let  $\mathcal{D}_S$  be the uniform distribution over  $\mathbf{x}_i \in \mathbb{R}^n$  from  $S$ . In this case, since  $\mathcal{D}_S$  is supported on  $A$ , we are guaranteed that with probability at least  $\frac{3}{4}$  over the choice of  $W$  and the internal randomness of  $\mathcal{L}$ , we have  $\ell_S(h) = \mathbb{E}_{\mathbf{x} \sim \mathcal{D}_S} [(h(\mathbf{x}) - h_W(\mathbf{x}))^2] \leq \frac{1}{10}$ . Therefore, the algorithm returns “ $\mathcal{D}_{\text{mat}}$ -realizable”.

Now, assume that  $S$  is scattered. Let  $h : \mathbb{R}^n \rightarrow \mathbb{R}$  be the function returned by  $\mathcal{L}$ . Let  $h' : \mathbb{R}^n \rightarrow \{0, 1\}$  be the following function. For every  $\mathbf{x} \in \mathbb{R}^n$ , if  $h(\mathbf{x}) \geq \frac{1}{2}$  then  $h'(\mathbf{x}) = 1$ , and otherwise  $h'(\mathbf{x}) = 0$ . Note that for every  $(\mathbf{x}_i, y_i) \in S$ , if  $h'(\mathbf{x}_i) \neq y_i$  then  $(h(\mathbf{x}_i) - y_i)^2 \geq \frac{1}{4}$ . Therefore,  $\ell_S(h) \geq \frac{1}{4} \ell_S(h')$ . Let  $C \subseteq [p(n)]$  be the set of indices of  $S$  that were not observed by  $\mathcal{L}$ . Note that given  $C$ , the events  $\{h'(\mathbf{x}_i) = y_i\}_{i \in C}$  are independent from one another, and each has probability  $\frac{1}{2}$ . By the Hoeffding bound, we have that  $h'(\mathbf{x}_i) \neq y_i$  for at most  $\frac{1}{2} - \sqrt{\frac{\ln(n)}{n}}$  fraction of the indices in  $C$  with probability at most

$$\exp\left(-\frac{2|C| \ln(n)}{n}\right) = \exp\left(-\frac{2(8m(n) + n) \ln(n)}{n}\right) \leq \exp(-2 \ln(n)) = \frac{1}{n^2}.$$

Thus,  $h'(\mathbf{x}_i) \neq y_i$  for at least  $\frac{1}{2} - o_n(1)$  fraction of the indices in  $C$  with probability at least  $1 - o_n(1)$ . Hence,

$$\ell_S(h) \geq \frac{1}{4} \ell_S(h') \geq \frac{1}{4} \cdot \frac{|C|}{p(n)} \left(\frac{1}{2} - o_n(1)\right) = \frac{1}{4} \cdot \frac{8m(n) + n}{9m(n) + n} \left(\frac{1}{2} - o_n(1)\right) \geq \frac{1}{9} - o_n(1).$$

Therefore, for large enough  $n$ , with probability at least  $\frac{3}{4}$  we have  $\ell_S(h) > \frac{1}{10}$ , and thus the algorithm returns “scattered”.  $\square$

### A.2 $\text{SCAT}_{n^d}^A(\mathcal{H}_{\text{sign-cnn}}^{n,m})$ is RSAT-hard

For a predicate  $P : \{\pm 1\}^K \rightarrow \{0, 1\}$  we denote by  $\text{CSP}(P, \neg P)$  the problem whose instances are collections,  $J$ , of constraints, each of which is either  $P$  or  $\neg P$  constraint, and the goal is to maximize the number of satisfied constraints. Denote by  $\text{CSP}_{m(n)}^{\text{rand}}(P, \neg P)$  the problem of distinguishing<sup>3</sup> satisfiable from random formulas with  $n$  variables and  $m(n)$  constraints. Here, in a random formula, each constraint is chosen w.p.  $\frac{1}{2}$  to be a uniform  $P$  constraint and w.p.  $\frac{1}{2}$  a uniform  $\neg P$  constraint.

We will consider the predicate  $T_{K,M} : \{0, 1\}^{KM} \rightarrow \{0, 1\}$  defined by

$$T_{K,M}(z) = (z_1 \vee \dots \vee z_K) \wedge (z_{K+1} \vee \dots \vee z_{2K}) \wedge \dots \wedge (z_{(M-1)K+1} \vee \dots \vee z_{MK}).$$

<sup>3</sup>As in  $\text{CSP}_{m(n)}^{\text{rand}}(P)$ , in order to succeed, an algorithm must return “satisfiable” w.p. at least  $\frac{3}{4} - o_n(1)$  on every satisfiable formula and “random” w.p. at least  $\frac{3}{4} - o_n(1)$  on random formulas.

We will need the following lemma from [17]. For an overview of its proof, see Appendix B.

**Lemma A.1.** [17] *Let  $q(n) = \omega(\log(n))$  with  $q(n) \leq \frac{n}{\log(n)}$ , and let  $d$  and  $K$  be fixed integers. The problem  $\text{CSP}_{n^d}^{\text{rand}}(\text{SAT}_K)$  can be efficiently reduced to the problem  $\text{CSP}_{n^{d-1}}^{\text{rand}}(T_{K,q(n)}, \neg T_{K,q(n)})$ .*

In the following lemma, we use Lemma A.1 in order to show RSAT-hardness of  $\text{SCAT}_{n^d}^A(\mathcal{H}_{\text{sign-cnn}}^{n,m})$  with some appropriate  $m$  and  $A$ .

**Lemma A.2.** *Let  $n = (n' + 1)\log^2(n')$ , and let  $d$  be a fixed integer. The problem  $\text{SCAT}_{n^d}^A(\mathcal{H}_{\text{sign-cnn}}^{n,\log^2(n')})$ , where  $A$  is the ball of radius  $\log^2(n')$  in  $\mathbb{R}^n$ , is RSAT-hard.*

*Proof.* By Assumption 2.1, there is  $K$  such that  $\text{CSP}_{(n')^{d+2}}^{\text{rand}}(\text{SAT}_K)$  is hard, where the  $K$ -SAT formula is over  $n'$  variables. Then, by Lemma A.1, the problem  $\text{CSP}_{(n')^{d+1}}^{\text{rand}}(T_{K,\log^2(n')}, \neg T_{K,\log^2(n')})$  is also hard. We will reduce  $\text{CSP}_{(n')^{d+1}}^{\text{rand}}(T_{K,\log^2(n')}, \neg T_{K,\log^2(n')})$  to  $\text{SCAT}_{(n')^{d+1}}^A(\mathcal{H}_{\text{sign-cnn}}^{n,\log^2(n')})$ . Since  $(n')^{d+1} > n^d$ , it would imply that  $\text{SCAT}_{n^d}^A(\mathcal{H}_{\text{sign-cnn}}^{n,\log^2(n')})$  is RSAT-hard.

Let  $J = \{C_1, \dots, C_{(n')^{d+1}}\}$  be an input for  $\text{CSP}_{(n')^{d+1}}^{\text{rand}}(T_{K,\log^2(n')}, \neg T_{K,\log^2(n')})$ . Namely, each constraint  $C_i$  is either a CNF or a DNF formula. Equivalently,  $J$  can be written as  $J' = \{(C'_1, y_1), \dots, (C'_{(n')^{d+1}}, y_{(n')^{d+1}})\}$  where for every  $i$ , if  $C_i$  is a DNF formula then  $C'_i = C_i$  and  $y_i = 1$ , and if  $C_i$  is a CNF formula then  $C'_i$  is the DNF obtained by negating  $C_i$ , and  $y_i = 0$ . Given  $J'$  as above, we encode each DNF formula  $C'_i$  (with  $\log^2(n')$  clauses) as a vector  $\mathbf{x}_i \in \mathbb{R}^n$  such that each clause  $[(\alpha_1, i_1), \dots, (\alpha_K, i_K)]$  in  $C'_i$  (a signed  $K$ -tuple) is encoded by a vector  $\mathbf{z} = (z_1, \dots, z_{n'+1})$  as follows. First, we have  $z_{n'+1} = -(K-1)$ . Then, for every  $1 \leq j \leq K$  we have  $z_{i_j} = \alpha_j$ , and for every variable  $l$  that does not appear in the clause we have  $z_l = 0$ . Thus, for every  $1 \leq l \leq n'$ , the value of  $z_l$  indicates whether the  $l$ -th variable appears in the clause as a positive literal, a negative literal, or does not appear. The encoding  $\mathbf{x}_i$  of  $C'_i$  is the concatenation of the encodings of its clauses.

Let  $S = \{(\mathbf{x}_1, y_1), \dots, (\mathbf{x}_{(n')^{d+1}}, y_{(n')^{d+1}})\}$ . If  $J$  is random then  $S$  is scattered, since each constraint  $C_i$  is with probability  $\frac{1}{2}$  a DNF formula, and with probability  $\frac{1}{2}$  a CNF formula, and this choice is independent of the choice of the literals in  $C_i$ . Assume now that  $J$  is satisfiable by an assignment  $\psi \in \{\pm 1\}^{n'}$ . Let  $\mathbf{w} = (\psi, 1) \in \{\pm 1\}^{n'+1}$ . Note that  $S$  is realizable by the CNN  $h_{\mathbf{w}}^n$  with  $\log^2(n')$  hidden neurons. Indeed, if  $\mathbf{z} \in \mathbb{R}^{n'+1}$  is the encoding of a clause of  $C'_i$ , then  $\langle \mathbf{z}, \mathbf{w} \rangle = 1$  if all the  $K$  literals in the clause are satisfied by  $\psi$ , and otherwise  $\langle \mathbf{z}, \mathbf{w} \rangle \leq -1$ . Therefore,  $h_{\mathbf{w}}^n(\mathbf{x}_i) = y_i$ .

Note that by our construction, for every  $i \in [(n')^{d+1}]$  we have for large enough  $n'$

$$\|\mathbf{x}_i\| = \sqrt{\log^2(n') (K + (K-1)^2)} \leq \log(n') \cdot K \leq \log^2(n').$$

□

### A.3 Hardness of learning random fully-connected neural networks

Let  $n = (n' + 1)\log^2(n')$ . We say that a matrix  $M$  of size  $n \times n$  is a *diagonal-blocks matrix* if

$$M = \begin{bmatrix} B^{11} & \dots & B^{1\log^2(n')} \\ \vdots & \ddots & \vdots \\ B^{\log^2(n')1} & \dots & B^{\log^2(n')\log^2(n')} \end{bmatrix}$$

where each block  $B^{ij}$  is a diagonal matrix  $\text{diag}(z_1^{ij}, \dots, z_{n'+1}^{ij})$ . For every  $1 \leq i \leq n' + 1$  let  $S_i = \{i + j(n' + 1) : 0 \leq j \leq \log^2(n') - 1\}$ . Let  $M_{S_i}$  be the submatrix of  $M$  obtained by selecting the rows and columns in  $S_i$ . Thus,  $M_{S_i}$  is a matrix of size  $\log^2(n') \times \log^2(n')$ . For  $\mathbf{x} \in \mathbb{R}^n$  let  $\mathbf{x}_{S_i} \in \mathbb{R}^{\log^2(n')}$  be the restriction of  $\mathbf{x}$  to the coordinates  $S_i$ .

**Lemma A.3.** *Let  $M$  be a diagonal-blocks matrix. Then,*

$$s_{\min}(M) \geq \min_{1 \leq i \leq n'+1} s_{\min}(M_{S_i}).$$

*Proof.* For every  $\mathbf{x} \in \mathbb{R}^n$  with  $\|\mathbf{x}\| = 1$  we have

$$\begin{aligned} \|M\mathbf{x}\|^2 &= \sum_{1 \leq i \leq n'+1} \|M_{S_i} \mathbf{x}_{S_i}\|^2 \geq \sum_{1 \leq i \leq n'+1} (s_{\min}(M_{S_i}) \|\mathbf{x}_{S_i}\|)^2 \\ &\geq \min_{1 \leq i \leq n'+1} (s_{\min}(M_{S_i}))^2 \sum_{1 \leq i \leq n'+1} \|\mathbf{x}_{S_i}\|^2 = \left( \min_{1 \leq i \leq n'+1} (s_{\min}(M_{S_i}))^2 \right) \|\mathbf{x}\|^2 \\ &= \min_{1 \leq i \leq n'+1} (s_{\min}(M_{S_i}))^2 . \end{aligned}$$

Hence,  $s_{\min}(M) \geq \min_{1 \leq i \leq n'+1} s_{\min}(M_{S_i})$ .  $\square$

### A.3.1 Proof of Theorem 3.1

Let  $M$  be a diagonal-blocks matrix, where each block  $B^{ij}$  is a diagonal matrix  $\text{diag}(z_1^{ij}, \dots, z_{n'+1}^{ij})$ . Assume that for all  $i, j, l$  the entries  $z_l^{ij}$  are i.i.d. copies of a random variable  $z$  that has a symmetric distribution  $\mathcal{D}_z$  with variance  $\sigma^2$ . Also, assume that the random variable  $z' = \frac{z}{\sigma}$  is  $b$ -subgaussian for some fixed  $b$ .

**Lemma A.4.**

$$\Pr \left( s_{\min}(M) \leq \frac{\sigma}{n' \log^2(n')} \right) = o_n(1) .$$

*Proof.* Let  $M' = \frac{1}{\sigma} M$ . By Lemma A.3, we have

$$s_{\min}(M') \geq \min_{1 \leq i \leq n'+1} s_{\min}(M'_{S_i}) . \quad (1)$$

Note that for every  $i$ , all entries of the matrix  $M'_{S_i}$  are i.i.d. copies of  $z'$ .

Now, we need the following theorem:

**Theorem A.2.** [42] *Let  $\xi$  be a real random variable with expectation 0 and variance 1, and assume that  $\xi$  is  $b$ -subgaussian for some  $b > 0$ . Let  $A$  be an  $n \times n$  matrix whose entries are i.i.d. copies of  $\xi$ . Then, for every  $t \geq 0$  we have*

$$\Pr \left( s_{\min}(A) \leq \frac{t}{\sqrt{n}} \right) \leq Ct + c^n$$

where  $C > 0$  and  $c \in (0, 1)$  depend only on  $b$ .

By Theorem A.2, since each matrix  $M'_{S_i}$  is of size  $\log^2(n') \times \log^2(n')$ , we have for every  $i \in [n'+1]$  that

$$\Pr \left( s_{\min}(M'_{S_i}) \leq \frac{t}{\log(n')} \right) \leq Ct + c^{\log^2(n')} .$$

By choosing  $t = \frac{1}{n' \log(n')}$  we have

$$\Pr \left( s_{\min}(M'_{S_i}) \leq \frac{1}{n' \log^2(n')} \right) \leq \frac{C}{n' \log(n')} + c^{\log^2(n')} .$$

Then, by the union bound we have

$$\Pr \left( \min_{1 \leq i \leq n'+1} (s_{\min}(M'_{S_i})) \leq \frac{1}{n' \log^2(n')} \right) \leq \frac{C(n'+1)}{n' \log(n')} + c^{\log^2(n')} (n'+1) = o_n(1) .$$

Combining this with  $s_{\min}(M) = \sigma \cdot s_{\min}(M')$  and with Eq. 1, we have

$$\begin{aligned} \Pr \left( s_{\min}(M) \leq \frac{\sigma}{n' \log^2(n')} \right) &= \Pr \left( s_{\min}(M') \leq \frac{1}{n' \log^2(n')} \right) \\ &\leq \Pr \left( \min_{1 \leq i \leq n'+1} (s_{\min}(M'_{S_i})) \leq \frac{1}{n' \log^2(n')} \right) = o_n(1) . \end{aligned}$$

$\square$

**Lemma A.5.** Let  $\mathcal{D}_{\text{mat}}$  be a distribution over  $\mathbb{R}^{n \times \log^2(n')}$  such that each entry is drawn i.i.d. from  $\mathcal{D}_z$ . Note that a  $\mathcal{D}_{\text{mat}}$ -random network  $h_W$  has  $\log^2(n') = \mathcal{O}(\log^2(n))$  hidden neurons. Let  $d$  be a fixed integer. Then,  $\text{SCAT}_{n^d}^A(\mathcal{D}_{\text{mat}})$  is RSAT-hard, where  $A$  is the ball of radius  $\frac{n \log^2(n)}{\sigma}$  in  $\mathbb{R}^n$ .

*Proof.* By Lemma A.2, the problem  $\text{SCAT}_{n^d}^{A'}(\mathcal{H}_{\text{sign-cnn}}^{n, \log^2(n')})$  where  $A'$  is the ball of radius  $\log^2(n')$  in  $\mathbb{R}^n$ , is RSAT-hard. We will reduce this problem to  $\text{SCAT}_{n^d}^A(\mathcal{D}_{\text{mat}})$ . Given a sample  $S = \{(\mathbf{x}_i, y_i)\}_{i=1}^{n^d} \in (\mathbb{R}^n \times \{0, 1\})^{n^d}$  with  $\|\mathbf{x}_i\| \leq \log^2(n')$  for every  $i \in [n^d]$ , we will, with probability  $1 - o_n(1)$ , construct a sample  $S'$  that is contained in  $A$ , such that if  $S$  is scattered then  $S'$  is scattered, and if  $S$  is  $\mathcal{H}_{\text{sign-cnn}}^{n, \log^2(n')}$ -realizable then  $S'$  is  $\mathcal{D}_{\text{mat}}$ -realizable. Note that our reduction is allowed to fail with probability  $o_n(1)$ . Indeed, distinguishing scattered from realizable requires success with probability  $\frac{3}{4} - o_n(1)$  and therefore reductions between such problems are not sensitive to a failure with probability  $o_n(1)$ .

Assuming that  $M$  is invertible (note that by Lemma A.4 it holds with probability  $1 - o_n(1)$ ), let  $S' = \{(\mathbf{x}'_1, y_1), \dots, (\mathbf{x}'_{n^d}, y_{n^d})\}$  where for every  $i \in [n^d]$  we have  $\mathbf{x}'_i = (M^\top)^{-1} \mathbf{x}_i$ . Note that if  $S$  is scattered then  $S'$  is also scattered.

Assume that  $S$  is realizable by the CNN  $h_{\mathbf{w}}$  with  $\mathbf{w} \in \{\pm 1\}^{n'+1}$ . Let  $W$  be the matrix of size  $n \times \log^2(n')$  such that  $h_W = h_{\mathbf{w}}$ . Thus,  $W = (\mathbf{w}^1, \dots, \mathbf{w}^{\log^2(n')})$  where for every  $i \in [\log^2(n')]$  we have  $(\mathbf{w}_{(i-1)(n'+1)+1}^i, \dots, \mathbf{w}_{i(n'+1)}^i) = \mathbf{w}$ , and  $\mathbf{w}_j^i = 0$  for every other  $j \in [n]$ . Let  $W' = MW$ . Note that  $S'$  is realizable by  $h_{W'}$ . Indeed, for every  $i \in [n^d]$  we have  $y_i = h_{\mathbf{w}}(\mathbf{x}_i) = h_W(\mathbf{x}_i)$ , and  $W^\top \mathbf{x}_i = W^\top M^\top (M^\top)^{-1} \mathbf{x}_i = (W')^\top \mathbf{x}'_i$ . Also, note that the entries of  $W'$  are i.i.d. copies of  $z$ . Indeed, denote  $M^\top = (\mathbf{v}^1, \dots, \mathbf{v}^n)$ . Then, for every line  $i \in [n]$  we denote  $i = (b-1)(n'+1) + r$ , where  $b, r$  are integers and  $1 \leq r \leq n'+1$ . Thus,  $b$  is the line index of the block in  $M$  that correspond to the  $i$ -th line in  $M$ , and  $r$  is the line index within the block. Now, note that

$$\begin{aligned} W'_{ij} &= \langle \mathbf{v}^i, \mathbf{w}^j \rangle = \langle (\mathbf{v}_{(j-1)(n'+1)+1}^i, \dots, \mathbf{v}_{j(n'+1)}^i), \mathbf{w} \rangle = \langle (B_{r1}^{bj}, \dots, B_{r(n'+1)}^{bj}), \mathbf{w} \rangle \\ &= B_{rr}^{bj} \cdot \mathbf{w}_r = z_r^{bj} \cdot \mathbf{w}_r. \end{aligned}$$

Since  $\mathcal{D}_z$  is symmetric and  $\mathbf{w}_r \in \{\pm 1\}$ , we have  $W'_{ij} \sim \mathcal{D}_z$  independently from the other entries. Thus,  $W' \sim \mathcal{D}_{\text{mat}}$ . Therefore,  $h_{W'}$  is a  $\mathcal{D}_{\text{mat}}$ -random network.

By Lemma A.4, we have with probability  $1 - o_n(1)$  that for every  $i \in [n^d]$ ,

$$\begin{aligned} \|\mathbf{x}'_i\| &= \|(M^\top)^{-1} \mathbf{x}_i\| \leq s_{\max}((M^\top)^{-1}) \|\mathbf{x}_i\| = \frac{1}{s_{\min}(M^\top)} \|\mathbf{x}_i\| = \frac{1}{s_{\min}(M)} \|\mathbf{x}_i\| \\ &\leq \frac{n' \log^2(n')}{\sigma} \log^2(n') \leq \frac{n \log^2(n)}{\sigma}. \end{aligned}$$

□

Finally, Theorem 3.1 follows immediately from Theorem A.1 and the following lemma.

**Lemma A.6.** Let  $\mathcal{D}_{\text{mat}}$  be a distribution over  $\mathbb{R}^{\tilde{n} \times m}$  with  $m = \mathcal{O}(\log^2(\tilde{n}))$ , such that each entry is drawn i.i.d. from  $\mathcal{D}_z$ . Let  $d$  be a fixed integer, and let  $\epsilon > 0$  be a small constant. Then,  $\text{SCAT}_{\tilde{n}^d}^A(\mathcal{D}_{\text{mat}})$  is RSAT-hard, where  $A$  is the ball of radius  $\frac{\tilde{n}^\epsilon}{\sigma}$  in  $\mathbb{R}^{\tilde{n}}$ .

*Proof.* For integers  $k, l$  we denote by  $\mathcal{D}_{\text{mat}}^{k,l}$  the distribution over  $\mathbb{R}^{k \times l}$  such that each entry is drawn i.i.d. from  $\mathcal{D}_z$ . Let  $c = \frac{2}{\epsilon}$ , and let  $\tilde{n} = n^c$ . By Lemma A.5, the problem  $\text{SCAT}_{\tilde{n}^d}^{A'}(\mathcal{D}_{\text{mat}}^{n^c, m})$  is RSAT-hard, where  $m = \mathcal{O}(\log^2(n))$ , and  $A'$  is the ball of radius  $\frac{n \log^2(n)}{\sigma}$  in  $\mathbb{R}^n$ . We reduce this problem to  $\text{SCAT}_{\tilde{n}^d}^A(\mathcal{D}_{\text{mat}}^{\tilde{n}, m})$ , where  $A$  is the ball of radius  $\frac{\tilde{n}^\epsilon}{\sigma}$  in  $\mathbb{R}^{\tilde{n}}$ . Note that  $m = \mathcal{O}(\log^2(n)) = \mathcal{O}(\log^2(\tilde{n}))$ .

Let  $S = \{(\mathbf{x}_i, y_i)\}_{i=1}^{n^{cd}} \in (\mathbb{R}^n \times \{0, 1\})^{n^{cd}}$  with  $\|\mathbf{x}_i\| \leq \frac{n \log^2(n)}{\sigma}$ . For every  $i \in [n^{cd}]$ , let  $\mathbf{x}'_i \in \mathbb{R}^{\tilde{n}}$  be the vector obtained from  $\mathbf{x}_i$  by padding it with zeros. Thus,  $\mathbf{x}'_i = (\mathbf{x}_i, 0, \dots, 0)$ . Note that  $n^{cd} = \tilde{n}^d$ . Let  $S' = \{(\mathbf{x}'_i, y_i)\}_{i=1}^{\tilde{n}^d}$ . If  $S$  is scattered then  $S'$  is also scattered. Note that if  $S$  is realizable by  $h_W$  then  $S'$  is realizable by  $h_{W'}$  where  $W'$  is obtained from  $W$  by appending  $\tilde{n} - n$

arbitrary lines. Assume that  $S$  is  $\mathcal{D}_{\text{mat}}^{n,m}$ -realizable, that is,  $W \sim \mathcal{D}_{\text{mat}}^{n,m}$ . Then,  $S'$  is realizable by  $h_{W'}$  where  $W'$  is obtained from  $W$  by appending lines such that each component is drawn i.i.d. from  $\mathcal{D}_z$ , and therefore,  $S'$  is  $\mathcal{D}_{\text{mat}}^{\tilde{n},m}$ -realizable. Finally, for every  $i \in \tilde{n}^d$  we have

$$\|\mathbf{x}'_i\| = \|\mathbf{x}_i\| \leq \frac{n \log^2(n)}{\sigma} = \frac{\tilde{n}^{\frac{1}{c}} \log^2(\tilde{n}^{\frac{1}{c}})}{\sigma} \leq \frac{\tilde{n}^{\frac{2}{c}}}{\sigma} = \frac{\tilde{n}^\epsilon}{\sigma}.$$

□

### A.3.2 Proof of Theorem 3.2

Let  $\mathcal{D}_{\text{mat}}$  be a distribution over  $\mathbb{R}^{n \times m}$  with  $m = \log^2(n)$ , such that each entry is drawn i.i.d. from  $\mathcal{N}(0, 1)$ . Let  $d$  be a fixed integer. By Lemma A.6, we have that  $\text{SCAT}_{n^d}^A(\mathcal{D}_{\text{mat}})$  is RSAT-hard, where  $A$  is the ball of radius  $n^\epsilon$  in  $\mathbb{R}^n$ . Let  $(\mathcal{N}(0, 1))^n$  be the distribution over  $\mathbb{R}^n$  where each component is drawn i.i.d. from  $\mathcal{N}(0, 1)$ . Recall that  $(\mathcal{N}(0, 1))^n = \mathcal{N}(\mathbf{0}, I_n)$  ([46]). Therefore, in the distribution  $\mathcal{D}_{\text{mat}}$ , the columns are drawn i.i.d. from  $\mathcal{N}(\mathbf{0}, I_n)$ . Let  $\mathcal{D}'_{\text{mat}}$  be a distribution over  $\mathbb{R}^{n \times m}$ , such that each column is drawn i.i.d. from  $\mathcal{N}(\mathbf{0}, \Sigma)$ . By Theorem A.1, we need to show that  $\text{SCAT}_{n^d}^{A'}(\mathcal{D}'_{\text{mat}})$  is RSAT-hard, where  $A'$  is the ball of radius  $\frac{n^\epsilon}{\sqrt{\lambda_{\min}}}$  in  $\mathbb{R}^n$ . We show a reduction from  $\text{SCAT}_{n^d}^A(\mathcal{D}_{\text{mat}})$  to  $\text{SCAT}_{n^d}^{A'}(\mathcal{D}'_{\text{mat}})$ .

Let  $S = \{(\mathbf{x}_i, y_i)\}_{i=1}^{n^d} \in (\mathbb{R}^n \times \{0, 1\})^{n^d}$  be a sample. Let  $\Sigma = U\Lambda U^\top$  be the spectral decomposition of  $\Sigma$ , and let  $M = U\Lambda^{\frac{1}{2}}$ . Recall that if  $\mathbf{w} \sim \mathcal{N}(\mathbf{0}, I_n)$  then  $M\mathbf{w} \sim \mathcal{N}(\mathbf{0}, \Sigma)$  ([46]). For every  $i \in [n^d]$ , let  $\mathbf{x}'_i = (M^\top)^{-1}\mathbf{x}_i$ , and let  $S' = \{(\mathbf{x}'_1, y_1), \dots, (\mathbf{x}'_{n^d}, y_{n^d})\}$ . Note that if  $S$  is scattered then  $S'$  is also scattered. If  $S$  is realizable by a  $\mathcal{D}_{\text{mat}}$ -random network  $h_W$ , then let  $W' = MW$ . Note that  $S'$  is realizable by  $h_{W'}$ . Indeed, for every  $i \in [n^d]$  we have  $(W')^\top \mathbf{x}'_i = W^\top M^\top (M^\top)^{-1} \mathbf{x}_i = W^\top \mathbf{x}_i$ . Let  $W = (\mathbf{w}_1, \dots, \mathbf{w}_m)$  and let  $W' = (\mathbf{w}'_1, \dots, \mathbf{w}'_m)$ . Since  $W' = MW$  then  $\mathbf{w}'_j = M\mathbf{w}_j$  for every  $j \in [m]$ . Now, since  $W \sim \mathcal{D}_{\text{mat}}$ , we have for every  $j$  that  $\mathbf{w}_j \sim \mathcal{N}(\mathbf{0}, I_n)$  (i.i.d.). Therefore,  $\mathbf{w}'_j = M\mathbf{w}_j \sim \mathcal{N}(\mathbf{0}, \Sigma)$ , and thus  $W' \sim \mathcal{D}'_{\text{mat}}$ . Hence,  $S'$  is  $\mathcal{D}'_{\text{mat}}$ -realizable.

We now bound the norms of the vectors  $\mathbf{x}'_i$  in  $S'$ . Note that for every  $i \in [n^d]$  we have

$$\|\mathbf{x}'_i\| = \|(M^\top)^{-1}\mathbf{x}_i\| = \left\| U\Lambda^{-\frac{1}{2}}\mathbf{x}_i \right\| = \left\| \Lambda^{-\frac{1}{2}}\mathbf{x}_i \right\| \leq \lambda_{\min}^{-\frac{1}{2}} \|\mathbf{x}_i\| \leq \lambda_{\min}^{-\frac{1}{2}} n^\epsilon.$$

### A.3.3 Proof of Theorem 3.3

Let  $n = (n' + 1) \log^2(n')$ , and let  $M$  be a diagonal-blocks matrix, where each block  $B^{ij}$  is a diagonal matrix  $\text{diag}(z_1^{ij}, \dots, z_{n'+1}^{ij})$ . We denote  $\mathbf{z}^{ij} = (z_1^{ij}, \dots, z_{n'+1}^{ij})$ , and  $\mathbf{z}^j = (\mathbf{z}^{1j}, \dots, \mathbf{z}^{\log^2(n')j}) \in \mathbb{R}^n$ . Note that for every  $j \in [\log^2(n')]$ , the vector  $\mathbf{z}^j$  contains all the entries on the diagonals of blocks in the  $j$ -th column of blocks in  $M$ . Assume that the vectors  $\mathbf{z}^j$  are drawn i.i.d. according to the uniform distribution on  $r \cdot \mathbb{S}^{n-1}$ .

**Lemma A.7.** *For some universal constant  $c' > 0$  we have*

$$\Pr \left( s_{\min}(M) \leq \frac{c'r}{n' \sqrt{n'} \log^5(n')} \right) = o_n(1).$$

*Proof.* Let  $M' = \frac{\sqrt{n}}{r}M$ . For every  $j \in [\log^2(n')]$ , let  $\tilde{\mathbf{z}}^j \in \mathbb{R}^n$  be the vector that contains all the entries on the diagonals of blocks in the  $j$ -th column of blocks in  $M'$ . That is,  $\tilde{\mathbf{z}}^j = \frac{\sqrt{n}}{r}\mathbf{z}^j$ . Note that the vectors  $\tilde{\mathbf{z}}^j$  are i.i.d. copies from the uniform distribution on  $\sqrt{n} \cdot \mathbb{S}^{n-1}$ . By Lemma A.3, we have

$$s_{\min}(M') \geq \min_{1 \leq i \leq n'+1} s_{\min}(M'_{S_i}). \quad (2)$$

Note that for every  $i$ , all columns of the matrix  $M'_{S_i}$  are projections of the vectors  $\tilde{\mathbf{z}}^j$  on the  $S_i$  coordinates. That is, the  $j$ -th column in  $M'_{S_i}$  is obtained by drawing  $\tilde{\mathbf{z}}^j$  from the uniform distribution on  $\sqrt{n} \cdot \mathbb{S}^{n-1}$  and projecting on the coordinates  $S_i$ .

We say that a distribution is *isotropic* if it has mean zero and its covariance matrix is the identity. The covariance matrix of the uniform distribution on  $\mathbb{S}^{n-1}$  is  $\frac{1}{n}I_n$ . Therefore, the uniform distribution on  $\sqrt{n} \cdot \mathbb{S}^{n-1}$  is isotropic. We will need the following theorem.

**Theorem A.3.** [1] Let  $m \geq 1$  and let  $A$  be an  $m \times m$  matrix with independent columns drawn from an isotropic log-concave distribution. For every  $\epsilon \in (0, 1)$  we have

$$\Pr \left( s_{\min}(A) \leq \frac{c\epsilon}{\sqrt{m}} \right) \leq Cm\epsilon$$

where  $c$  and  $C$  are positive universal constants.

We show that the distribution of the columns of  $M'_{S_i}$  is isotropic and log-concave. First, since the uniform distribution on  $\sqrt{n} \cdot \mathbb{S}^{n-1}$  is isotropic, then its projection on a subset of coordinates is also isotropic, and thus the distribution of the columns of  $M'_{S_i}$  is isotropic. In order to show that it is log-concave, we analyze its density. Let  $\mathbf{x} \in \mathbb{R}^n$  be a random variable whose distribution is the projection of a uniform distribution on  $\mathbb{S}^{n-1}$  on  $k$  coordinates. It is known that the probability density of  $\mathbf{x}$  is (see [25])

$$f_{\mathbf{x}}(x_1, \dots, x_k) = \frac{\Gamma(n/2)}{\Gamma((n-k)/2)\pi^{k/2}} \left( 1 - \sum_{1 \leq i \leq k} x_i^2 \right)^{\frac{n-k}{2}-1},$$

where  $\sum_{1 \leq i \leq k} x_i^2 < 1$ . Recall that the columns of  $M'_{S_i}$  are projections of the uniform distribution over  $\sqrt{n} \cdot \mathbb{S}^{n-1}$ , namely, the sphere of radius  $\sqrt{n}$  and not the unit sphere. Thus, let  $\mathbf{x}' = \sqrt{n}\mathbf{x}$ . The probability density of  $\mathbf{x}'$  is

$$\begin{aligned} f_{\mathbf{x}'}(x'_1, \dots, x'_k) &= \frac{1}{(\sqrt{n})^k} f_{\mathbf{x}} \left( \frac{x'_1}{\sqrt{n}}, \dots, \frac{x'_k}{\sqrt{n}} \right) \\ &= \frac{1}{n^{k/2}} \cdot \frac{\Gamma(n/2)}{\Gamma((n-k)/2)\pi^{k/2}} \left( 1 - \sum_{1 \leq i \leq k} \left( \frac{x'_i}{\sqrt{n}} \right)^2 \right)^{\frac{n-k}{2}-1}, \end{aligned}$$

where  $\sum_{1 \leq i \leq k} (x'_i)^2 < n$ . We denote

$$g(n, k) = \frac{1}{n^{k/2}} \cdot \frac{\Gamma(n/2)}{\Gamma((n-k)/2)\pi^{k/2}}.$$

By replacing  $k$  with  $\log^2(n')$  we have

$$f_{\mathbf{x}'}(x'_1, \dots, x'_{\log^2(n')}) = g(n, \log^2(n')) \left( 1 - \frac{1}{n} \sum_{1 \leq i \leq \log^2(n')} (x'_i)^2 \right)^{\frac{n-\log^2(n')}{2}-1}.$$

Hence, we have

$$\begin{aligned} \log f_{\mathbf{x}'}(x'_1, \dots, x'_{\log^2(n')}) &= \\ \log(g(n, \log^2(n'))) &+ \left( \frac{n-\log^2(n')}{2} - 1 \right) \cdot \log \left( 1 - \frac{1}{n} \sum_{1 \leq i \leq \log^2(n')} (x'_i)^2 \right). \end{aligned}$$

Since  $\frac{n-\log^2(n')}{2} - 1 > 0$ , we need to show that the function

$$\log \left( 1 - \frac{1}{n} \sum_{1 \leq i \leq \log^2(n')} (x'_i)^2 \right) \quad (3)$$

(where  $\sum_{1 \leq i \leq \log^2(n')} (x'_i)^2 < n$ ) is concave. This function can be written as  $h(f(x_1, \dots, x_{\log^2(n')}))$ , where

$$\begin{aligned} h(x) &= \log(1+x), \\ f(x'_1, \dots, x'_{\log^2(n')}) &= -\frac{1}{n} \sum_{1 \leq i \leq \log^2(n')} (x'_i)^2. \end{aligned}$$

Recall that if  $h$  is concave and non-decreasing, and  $f$  is concave, then their composition is also concave. Clearly,  $h$  and  $f$  satisfy these conditions, and thus the function in Eq. 3 is concave. Hence  $f_{\mathbf{x}'}$  is log-concave.

We now apply Theorem A.3 on  $M'_{S_i}$ , and obtain that for every  $\epsilon \in (0, 1)$  we have

$$\Pr \left( s_{\min}(M'_{S_i}) \leq \frac{c\epsilon}{\log(n')} \right) \leq C \log^2(n')\epsilon.$$

By choosing  $\epsilon = \frac{1}{n' \log^3(n')}$  we have

$$\Pr \left( s_{\min}(M'_{S_i}) \leq \frac{c}{n' \log^4(n')} \right) \leq \frac{C}{n' \log(n')}.$$

Now, by the union bound

$$\Pr \left( \min_{1 \leq i \leq n'+1} (s_{\min}(M'_{S_i})) \leq \frac{c}{n' \log^4(n')} \right) \leq \frac{C}{n' \log(n')} \cdot (n' + 1) = o_n(1).$$

Combining this with  $s_{\min}(M) = \frac{r}{\sqrt{n}} s_{\min}(M')$  and with Eq. 2, we have

$$\begin{aligned} \Pr \left( s_{\min}(M) \leq \frac{cr}{\sqrt{n} \cdot n' \log^4(n')} \right) &= \Pr \left( s_{\min}(M') \leq \frac{c}{n' \log^4(n')} \right) \\ &\leq \Pr \left( \min_{1 \leq i \leq n'+1} (s_{\min}(M'_{S_i})) \leq \frac{c}{n' \log^4(n')} \right) = o_n(1). \end{aligned}$$

Note that

$$\frac{cr}{\sqrt{n} \cdot n' \log^4(n')} = \frac{cr}{\sqrt{n'+1} \cdot n' \log^5(n')} \geq \frac{cr}{2\sqrt{n'} \cdot n' \log^5(n')} = \frac{c'r}{\sqrt{n'} \cdot n' \log^5(n')},$$

where  $c' = \frac{c}{2}$ . Thus,

$$\Pr \left( s_{\min}(M) \leq \frac{c'r}{\sqrt{n'} \cdot n' \log^5(n')} \right) \leq \Pr \left( s_{\min}(M) \leq \frac{cr}{\sqrt{n} \cdot n' \log^4(n')} \right) = o_n(1).$$

□

Let  $\mathcal{D}_{\text{mat}}$  be a distribution over  $\mathbb{R}^{n \times \log^2(n')}$  such that each column is drawn i.i.d. from the uniform distribution on  $r \cdot \mathbb{S}^{n-1}$ . Note that a  $\mathcal{D}_{\text{mat}}$ -random network  $h_W$  has  $\log^2(n') = \mathcal{O}(\log^2(n))$  hidden neurons. Now, Theorem 3.3 follows immediately from Theorem A.1 and the following lemma.

**Lemma A.8.** *Let  $d$  be a fixed integer. Then,  $\text{SCAT}_{n^d}^A(\mathcal{D}_{\text{mat}})$  is RSAT-hard, where  $A$  is a ball of radius  $\mathcal{O}\left(\frac{n\sqrt{n}\log^4(n)}{r}\right)$  in  $\mathbb{R}^n$ .*

*Proof.* By Lemma A.2, the problem  $\text{SCAT}_{n^d}^{A'}(\mathcal{H}_{\text{sign-cnn}}^{n, \log^2(n')})$  where  $A'$  is the ball of radius  $\log^2(n')$  in  $\mathbb{R}^n$ , is RSAT-hard. We will reduce this problem to  $\text{SCAT}_{n^d}^A(\mathcal{D}_{\text{mat}})$ . Given a sample  $S = \{(\mathbf{x}_i, y_i)\}_{i=1}^{n^d} \in (\mathbb{R}^n \times \{0, 1\})^{n^d}$  with  $\|\mathbf{x}_i\| \leq \log^2(n')$  for every  $i \in [n^d]$ , we will, with probability  $1 - o_n(1)$ , construct a sample  $S'$  that is contained in  $A$ , such that if  $S$  is scattered then  $S'$  is scattered, and if  $S$  is  $\mathcal{H}_{\text{sign-cnn}}^{n, \log^2(n')}$ -realizable then  $S'$  is  $\mathcal{D}_{\text{mat}}$ -realizable. Note that our reduction is allowed to fail with probability  $o_n(1)$ . Indeed, distinguishing scattered from realizable requires success with probability  $\frac{3}{4} - o_n(1)$  and therefore reductions between such problems are not sensitive to a failure with probability  $o_n(1)$ .

Assuming that  $M$  is invertible (by Lemma A.7 it holds with probability  $1 - o_n(1)$ ), let  $S' = \{(\mathbf{x}'_1, y_1), \dots, (\mathbf{x}'_{n^d}, y_{n^d})\}$  where for every  $i$  we have  $\mathbf{x}'_i = (M^\top)^{-1} \mathbf{x}_i$ . Note that if  $S$  is scattered then  $S'$  is also scattered.

Assume that  $S$  is realizable by the CNN  $h_{\mathbf{w}}^n$  with  $\mathbf{w} \in \{\pm 1\}^{n'+1}$ . Let  $W$  be the matrix of size  $n \times \log^2(n')$  such that  $h_W = h_{\mathbf{w}}^n$ . Thus,  $W = (\mathbf{w}^1, \dots, \mathbf{w}^{\log^2(n')})$  where for every  $i \in [\log^2(n')]$

we have  $(\mathbf{w}_{(i-1)(n'+1)+1}^i, \dots, \mathbf{w}_{i(n'+1)}^i) = \mathbf{w}$ , and  $\mathbf{w}_j^i = 0$  for every other  $j \in [n]$ . Let  $W' = MW$ . Note that  $S'$  is realizable by  $h_{W'}$ . Indeed, for every  $i \in [n^d]$  we have  $y_i = h_{\mathbf{w}}^n(\mathbf{x}_i) = h_W(\mathbf{x}_i)$ , and  $W^\top \mathbf{x}_i = W^\top M^\top (M^\top)^{-1} \mathbf{x}_i = (W')^\top \mathbf{x}'_i$ . Also, note that the columns of  $W'$  are i.i.d. copies from the uniform distribution on  $r \cdot \mathbb{S}^{n-1}$ . Indeed, denote  $M^\top = (\mathbf{v}^1, \dots, \mathbf{v}^n)$ . Then, for every line index  $i \in [n]$  we denote  $i = (b-1)(n'+1) + r$ , where  $b, r$  are integers and  $1 \leq r \leq n'+1$ . Thus,  $b$  is the line index of the block in  $M$  that correspond to the  $i$ -th line in  $M$ , and  $r$  is the line index within the block. Now, note that

$$\begin{aligned} W'_{ij} &= \langle \mathbf{v}^i, \mathbf{w}^j \rangle = \langle (\mathbf{v}_{(j-1)(n'+1)+1}^i, \dots, \mathbf{v}_{j(n'+1)}^i), \mathbf{w} \rangle = \langle (B_{r1}^{bj}, \dots, B_{r(n'+1)}^{bj}), \mathbf{w} \rangle \\ &= B_{rr}^{bj} \cdot \mathbf{w}_r = z_r^{bj} \cdot \mathbf{w}_r. \end{aligned}$$

Since  $\mathbf{w}_r \in \{\pm 1\}$ , and since the uniform distribution on a sphere does not change by multiplying a subset of component by  $-1$ , then the  $j$ -th column of  $W'$  has the same distribution as  $\mathbf{z}^j$ , namely, the uniform distribution over  $r \cdot \mathbb{S}^{n-1}$ . Also, the columns of  $W'$  are independent. Thus,  $W' \sim \mathcal{D}_{\text{mat}}$ , and therefore  $h_{W'}$  is a  $\mathcal{D}_{\text{mat}}$ -random network.

By Lemma A.7, we have with probability  $1 - o_n(1)$  that for every  $i$ ,

$$\begin{aligned} \|\mathbf{x}'_i\| &= \|(M^\top)^{-1} \mathbf{x}_i\| \leq s_{\max}((M^\top)^{-1}) \|\mathbf{x}_i\| = \frac{1}{s_{\min}(M^\top)} \|\mathbf{x}_i\| = \frac{1}{s_{\min}(M)} \|\mathbf{x}_i\| \\ &\leq \frac{n' \sqrt{n'} \log^5(n')}{c'r} \cdot \log^2(n') \leq \frac{n' \sqrt{n'} \log^4(n')}{c'r}. \end{aligned}$$

Thus,  $\|\mathbf{x}'_i\| = \mathcal{O}\left(\frac{n' \sqrt{n'} \log^4(n')}{r}\right)$ .  $\square$

## A.4 Hardness of learning random convolutional neural networks

### A.4.1 Proof of Theorem 3.4

Theorem 3.4 follows immediately from Theorem A.1 and the following lemma:

**Lemma A.9.** *Let  $d$  be a fixed integer. Then,  $\text{SCAT}_{n^d}^A(\mathcal{D}_z^{n'+1}, n)$  is RSAT-hard, where  $A$  is the ball of radius  $\frac{\log^2(n')}{f(n')}$  in  $\mathbb{R}^n$ .*

*Proof.* By Lemma A.2, the problem  $\text{SCAT}_{n^d}^{A'}(\mathcal{H}_{\text{sign-cnn}}^{n, \log^2(n')})$  where  $A'$  is the ball of radius  $\log^2(n')$  in  $\mathbb{R}^n$ , is RSAT-hard. We will reduce this problem to  $\text{SCAT}_{n^d}^A(\mathcal{D}_z^{n'+1}, n)$ . Given a sample  $S = \{(\mathbf{x}_i, y_i)\}_{i=1}^{n^d} \in (\mathbb{R}^n \times \{0, 1\})^{n^d}$  with  $\|\mathbf{x}_i\| \leq \log^2(n')$  for every  $i \in [n^d]$ , we will, with probability  $1 - o_n(1)$ , construct a sample  $S'$  that is contained in  $A$ , such that if  $S$  is scattered then  $S'$  is scattered, and if  $S$  is  $\mathcal{H}_{\text{sign-cnn}}^{n, \log^2(n')}$ -realizable then  $S'$  is  $\mathcal{D}_z^{n'+1}$ -realizable. Note that our reduction is allowed to fail with probability  $o_n(1)$ . Indeed, distinguishing scattered from realizable requires success with probability  $\frac{3}{4} - o_n(1)$  and therefore reductions between such problems are not sensitive to a failure with probability  $o_n(1)$ .

Let  $\mathbf{z} = (z_1, \dots, z_{n'+1})$  where each  $z_i$  is drawn i.i.d. from  $\mathcal{D}_z$ . Let  $M = \text{diag}(\mathbf{z})$  be a diagonal matrix. Note that  $M$  is invertible with probability  $1 - o_n(1)$ , since for every  $i \in [n'+1]$  we have  $\Pr_{z_i \sim \mathcal{D}_z}(z_i = 0) \leq \Pr_{z_i \sim \mathcal{D}_z}(|z_i| < f(n')) = o(\frac{1}{n'})$ . Now, for every  $\mathbf{x}_i$  from  $S$ , denote  $\mathbf{x}_i = (\mathbf{x}_1^i, \dots, \mathbf{x}_{\log^2(n')}^i)$  where for every  $j$  we have  $\mathbf{x}_j^i \in \mathbb{R}^{n'+1}$ . Let  $\mathbf{x}'_i = (M^{-1} \mathbf{x}_1^i, \dots, M^{-1} \mathbf{x}_{\log^2(n')}^i)$ , and let  $S' = \{(\mathbf{x}'_1, y_1), \dots, (\mathbf{x}'_{n^d}, y_{n^d})\}$ . Note that if  $S$  is scattered then  $S'$  is also scattered. If  $S$  is realizable by a CNN  $h_{\mathbf{w}}^n \in \mathcal{H}_{\text{sign-cnn}}^{n, \log^2(n')}$ , then let  $\mathbf{w}' = M\mathbf{w}$ . Note that  $S'$  is realizable by  $h_{\mathbf{w}'}$ . Indeed, for every  $i$  and  $j$  we have  $\langle \mathbf{w}', M^{-1} \mathbf{x}_j^i \rangle = \mathbf{w}'^\top M^\top M^{-1} \mathbf{x}_j^i = \mathbf{w}'^\top M M^{-1} \mathbf{x}_j^i = \langle \mathbf{w}, \mathbf{x}_j^i \rangle$ . Also, note that since  $\mathbf{w} \in \{\pm 1\}^{n'+1}$  and  $\mathcal{D}_z$  is symmetric, then  $\mathbf{w}'$  has the distribution  $\mathcal{D}_z^{n'+1}$ , and thus  $h_{\mathbf{w}'}$  is a  $\mathcal{D}_z^{n'+1}$ -random CNN.



The probability that  $\mathbf{z} \sim \mathcal{D}_z^{n'+1}$  has some component  $z_i$  with  $|z_i| < f(n')$ , is at most  $(n'+1) \cdot o(\frac{1}{n'}) = o_n(1)$ . Therefore, with probability  $1 - o_n(1)$  we have for every  $i \in [n^d]$  that

$$\begin{aligned} \|\mathbf{x}'_i\|^2 &= \sum_{1 \leq j \leq \log^2(n')} \|M^{-1} \mathbf{x}_j^i\|^2 \leq \sum_{1 \leq j \leq \log^2(n')} \left( \frac{1}{f(n')} \|\mathbf{x}_j^i\| \right)^2 = \frac{1}{(f(n'))^2} \sum_{1 \leq j \leq \log^2(n')} \|\mathbf{x}_j^i\|^2 \\ &= \frac{1}{(f(n'))^2} \|\mathbf{x}_i\|^2 \leq \frac{\log^4(n')}{(f(n'))^2}. \end{aligned}$$

Thus,  $\|\mathbf{x}'_i\| \leq \frac{\log^2(n')}{f(n')}$ .  $\square$

#### A.4.2 Proof of Theorem 3.5

Assume that the covariance matrix  $\Sigma$  is of size  $(n'+1) \times (n'+1)$ , and let  $n = (n'+1) \log^2(n')$ . Note that a  $\mathcal{N}(\mathbf{0}, \Sigma)$ -random CNN  $h_{\mathbf{w}}^n$  has  $\log^2(n') = \mathcal{O}(\log^2(n))$  hidden neurons. Let  $\mathcal{D}_{\text{vec}}$  be a distribution over  $\mathbb{R}^{n'+1}$  such that each component is drawn i.i.d. from  $\mathcal{N}(0, 1)$ . Let  $d$  be a fixed integer. By Lemma A.9 and by choosing  $f(n') = \frac{1}{n' \log(n')}$ , we have that  $\text{SCAT}_{n^d}^A(\mathcal{D}_{\text{vec}}, n)$  is RSAT-hard, where  $A$  is the ball of radius  $n' \log^3(n') \leq n \log(n)$  in  $\mathbb{R}^n$ . Note that  $\mathcal{D}_{\text{vec}} = \mathcal{N}(\mathbf{0}, I_{n'+1})$  ([46]). By Theorem A.1, we need to show that  $\text{SCAT}_{n^d}^{A'}(\mathcal{N}(\mathbf{0}, \Sigma), n)$  is RSAT-hard, where  $A'$  is the ball of radius  $\lambda_{\min}^{-\frac{1}{2}} n \log(n)$  in  $\mathbb{R}^n$ . We show a reduction from  $\text{SCAT}_{n^d}^A(\mathcal{N}(\mathbf{0}, I_{n'+1}), n)$  to  $\text{SCAT}_{n^d}^{A'}(\mathcal{N}(\mathbf{0}, \Sigma), n)$ .

Let  $S = \{(\mathbf{x}_i, y_i)\}_{i=1}^{n^d} \in (\mathbb{R}^n \times \{0, 1\})^{n^d}$  be a sample. For every  $\mathbf{x}_i$  from  $S$ , denote  $\mathbf{x}_i = (\mathbf{x}_1^i, \dots, \mathbf{x}_{\log^2(n')}^i)$  where for every  $j$  we have  $\mathbf{x}_j^i \in \mathbb{R}^{n'+1}$ . Let  $\Sigma = U\Lambda U^\top$  be the spectral decomposition of  $\Sigma$ , and let  $M = U\Lambda^{\frac{1}{2}}$ . Recall that if  $\mathbf{w} \sim \mathcal{N}(\mathbf{0}, I_{n'+1})$  then  $M\mathbf{w} \sim \mathcal{N}(\mathbf{0}, \Sigma)$  ([46]). Let  $\mathbf{x}'_i = ((M^\top)^{-1} \mathbf{x}_1^i, \dots, (M^\top)^{-1} \mathbf{x}_{\log^2(n')}^i)$ , and let  $S' = \{(\mathbf{x}'_1, y_1), \dots, (\mathbf{x}'_{n^d}, y_{n^d})\}$ . Note that if  $S$  is scattered then  $S'$  is also scattered. If  $S$  is realizable by a  $\mathcal{N}(\mathbf{0}, I_{n'+1})$ -random CNN  $h_{\mathbf{w}}^n$ , then let  $\mathbf{w}' = M\mathbf{w}$ . Note that  $S'$  is realizable by  $h_{\mathbf{w}'}^n$ . Indeed, for every  $i$  and  $j$  we have  $\langle \mathbf{w}', (M^\top)^{-1} \mathbf{x}_j^i \rangle = \mathbf{w}^\top M^\top (M^\top)^{-1} \mathbf{x}_j^i = \langle \mathbf{w}, \mathbf{x}_j^i \rangle$ . Since  $\mathbf{w}' = M\mathbf{w} \sim \mathcal{N}(\mathbf{0}, \Sigma)$ , the sample  $S'$  is  $\mathcal{N}(\mathbf{0}, \Sigma)$ -realizable.

We now bound the norms of  $\mathbf{x}'_i$  in  $S'$ . Note that for every  $i \in [n^d]$  we have

$$\begin{aligned} \|\mathbf{x}'_i\|^2 &= \sum_{1 \leq j \leq \log^2(n')} \|(M^\top)^{-1} \mathbf{x}_j^i\|^2 = \sum_{1 \leq j \leq \log^2(n')} \|U\Lambda^{-\frac{1}{2}} \mathbf{x}_j^i\|^2 = \sum_{1 \leq j \leq \log^2(n')} \|\Lambda^{-\frac{1}{2}} \mathbf{x}_j^i\|^2 \\ &\leq \sum_{1 \leq j \leq \log^2(n')} \|\lambda_{\min}^{-\frac{1}{2}} \mathbf{x}_j^i\|^2 = \lambda_{\min}^{-1} \sum_{1 \leq j \leq \log^2(n')} \|\mathbf{x}_j^i\|^2 = \lambda_{\min}^{-1} \|\mathbf{x}_i\|^2. \end{aligned}$$

Hence,  $\|\mathbf{x}'_i\| \leq \lambda_{\min}^{-\frac{1}{2}} \|\mathbf{x}_i\| \leq \lambda_{\min}^{-\frac{1}{2}} n \log(n)$ .

#### A.4.3 Proof of Theorem 3.6

Let  $n = (n'+1) \log^2(n')$ . Let  $\mathcal{D}_{\text{vec}}$  be the uniform distribution on  $r \cdot \mathbb{S}^{n'}$ . Note that a  $\mathcal{D}_{\text{vec}}$ -random CNN  $h_{\mathbf{w}}^n$  has  $\log^2(n') = \mathcal{O}(\log^2(n))$  hidden neurons. Let  $d$  be a fixed integer. By Theorem A.1, we need to show that  $\text{SCAT}_{n^d}^A(\mathcal{D}_{\text{vec}}, n)$  is RSAT-hard, where  $A$  is the ball of radius  $\frac{\sqrt{n} \log(n)}{r}$  in  $\mathbb{R}^n$ . By Lemma A.2, the problem  $\text{SCAT}_{n^d}^{A'}(\mathcal{H}_{\text{sign-cnn}}^{n, \log^2(n')})$  where  $A'$  is the ball of radius  $\log^2(n')$  in  $\mathbb{R}^n$ , is RSAT-hard. We reduce this problem to  $\text{SCAT}_{n^d}^A(\mathcal{D}_{\text{vec}}, n)$ . Given a sample  $S = \{(\mathbf{x}_i, y_i)\}_{i=1}^{n^d} \in (\mathbb{R}^n \times \{0, 1\})^{n^d}$  with  $\|\mathbf{x}_i\| \leq \log^2(n')$  for every  $i \in [n^d]$ , we construct a sample  $S'$  that is contained in  $A$ , such that if  $S$  is scattered then  $S'$  is scattered, and if  $S$  is  $\mathcal{H}_{\text{sign-cnn}}^{n, \log^2(n')}$ -realizable then  $S'$  is  $\mathcal{D}_{\text{vec}}$ -realizable.

Let  $M$  be a random orthogonal matrix of size  $(n'+1) \times (n'+1)$ . For every  $i \in [n^d]$  denote  $\mathbf{x}_i = (\mathbf{x}_1^i, \dots, \mathbf{x}_{\log^2(n')}^i)$  where for every  $j$  we have  $\mathbf{x}_j^i \in \mathbb{R}^{n'+1}$ . For every  $i \in [n^d]$  let  $\mathbf{x}'_i =$

$(\frac{\sqrt{n'+1}}{r}M\mathbf{x}_1^i, \dots, \frac{\sqrt{n'+1}}{r}M\mathbf{x}_{\log^2(n')}^i)$ , and let  $S' = \{(\mathbf{x}'_1, y_1), \dots, (\mathbf{x}'_{n^d}, y_{n^d})\}$ . Note that if  $S$  is scattered then  $S'$  is also scattered. If  $S$  is realizable by a CNN  $h_{\mathbf{w}}^n \in \mathcal{H}_{\text{sign-cnn}}^{n, \log^2(n')}$ , then let  $\mathbf{w}' = \frac{r}{\sqrt{n'+1}}M\mathbf{w}$ . Note that  $S'$  is realizable by  $h_{\mathbf{w}'}^n$ . Indeed, for every  $i$  and  $j$  we have

$$\langle \mathbf{w}', \frac{\sqrt{n'+1}}{r}M\mathbf{x}_j^i \rangle = \mathbf{w}'^\top \frac{r}{\sqrt{n'+1}}M^\top \frac{\sqrt{n'+1}}{r}M\mathbf{x}_j^i = \langle \mathbf{w}, \mathbf{x}_j^i \rangle.$$

Also, note that since  $\|\mathbf{w}'\| = \sqrt{n'+1}$  and  $M$  is orthogonal,  $\mathbf{w}'$  is a random vector on the sphere of radius  $r$  in  $\mathbb{R}^{n'+1}$ , and thus  $h_{\mathbf{w}'}^n$  is a  $\mathcal{D}_{\text{vec}}$ -random CNN.

Since  $M$  is orthogonal then for every  $i \in [n^d]$  we have

$$\begin{aligned} \|\mathbf{x}'_i\|^2 &= \sum_{1 \leq j \leq \log^2(n')} \left\| \frac{\sqrt{n'+1}}{r}M\mathbf{x}_j^i \right\|^2 = \frac{n'+1}{r^2} \sum_{1 \leq j \leq \log^2(n')} \|\mathbf{x}_j^i\|^2 \\ &= \frac{n'+1}{r^2} \cdot \|\mathbf{x}_i\|^2 \leq \frac{(n'+1)\log^4(n')}{r^2} \leq \frac{n\log^2(n)}{r^2}. \end{aligned}$$

Hence  $\|\mathbf{x}'_i\| \leq \frac{\sqrt{n}\log(n)}{r}$ .

## B From $\text{CSP}_{n^d}^{\text{rand}}(\text{SAT}_K)$ to $\text{CSP}_{n^{d-1}}^{\text{rand}}(T_{K,q(n)}, \neg T_{K,q(n)})$ ([17])

We outline the main ideas of the reduction.

First, we reduce  $\text{CSP}_{n^d}^{\text{rand}}(\text{SAT}_K)$  to  $\text{CSP}_{n^{d-1}}^{\text{rand}}(T_{K,q(n)})$ . This is done as follows. Given an instance  $J = \{C_1, \dots, C_{n^d}\}$  to  $\text{CSP}(\text{SAT}_K)$ , by a simple greedy procedure, we try to find  $n^{d-1}$  disjoint subsets  $J'_1, \dots, J'_{n^{d-1}} \subset J$ , such that for every  $t$ , the subset  $J'_t$  consists of  $q(n)$  constraints and each variable appears in at most one of the constraints in  $J'_t$ . Now, from every  $J'_t$  we construct a  $T_{K,q(n)}$ -constraint that is the conjunction of all constraints in  $J'_t$ . If  $J$  is random, this procedure will succeed w.h.p. and will produce a random  $T_{K,q(n)}$ -formula. If  $J$  is satisfiable, this procedure will either fail or produce a satisfiable  $T_{K,q(n)}$ -formula.

Now, we reduce  $\text{CSP}_{n^{d-1}}^{\text{rand}}(T_{K,q(n)})$  to  $\text{CSP}_{n^{d-1}}^{\text{rand}}(T_{K,q(n)}, \neg T_{K,q(n)})$ . This is done by replacing each constraint, with probability  $\frac{1}{2}$ , with a random  $\neg P$  constraint. Clearly, if the original instance is a random instance of  $\text{CSP}_{n^{d-1}}^{\text{rand}}(T_{K,q(n)})$ , then the produced instance is a random instance of  $\text{CSP}_{n^{d-1}}^{\text{rand}}(T_{K,q(n)}, \neg T_{K,q(n)})$ . Furthermore, if the original instance is satisfied by the assignment  $\psi \in \{\pm 1\}^n$ , the same  $\psi$ , w.h.p., will satisfy all the new constraints. The reason is that the probability that a random  $\neg T_{K,q(n)}$ -constraint is satisfied by  $\psi$  is  $1 - (1 - 2^{-K})^{q(n)}$ , and hence, the probability that all new constraints are satisfied by  $\psi$  is at least  $1 - n^{d-1} (1 - 2^{-K})^{q(n)}$ . Now, since  $q(n) = \omega(\log(n))$ , the last probability is  $1 - o_n(1)$ .

For the full proof see [17].

## C Improving the bounds on the support of $\mathcal{D}$ in the convolutional networks

We show that by increasing the number of hidden neurons from  $\mathcal{O}(\log^2(n))$  to  $\mathcal{O}(n)$  we can improve the bounds on the support of  $\mathcal{D}$ . Note that our results so far on learning random CNNs, are for CNNs with input dimension  $n = \mathcal{O}(t \log^2(t))$  where  $t$  is the size of the patches. We now consider CNNs with input dimension  $\tilde{n} = t^c$  for some integer  $c > 1$ . Note that such CNNs have  $t^{c-1} = \mathcal{O}(\tilde{n})$  hidden neurons.

Assume that there is an efficient algorithms  $\mathcal{L}'$  for learning  $\mathcal{D}_{\text{vec}}$ -random CNNs with input dimension  $\tilde{n} = t^c$ , where  $\mathcal{D}_{\text{vec}}$  is a distribution over  $\mathbb{R}^{\tilde{n}}$ . Assume that  $\mathcal{L}'$  uses samples with at most  $\tilde{n}^d = t^{cd}$  inputs. We show an algorithm  $\mathcal{L}$  for learning a  $\mathcal{D}_{\text{vec}}$ -random CNN  $h_{\mathbf{w}}^n$  with  $n = \mathcal{O}(t \log^2(t))$ . Let  $S = \{(\mathbf{x}_1, h_{\mathbf{w}}^n(\mathbf{x}_1)), \dots, (\mathbf{x}_{n^{cd}}, h_{\mathbf{w}}^n(\mathbf{x}_{n^{cd}}))\}$  be a sample, and let  $S' = \{(\mathbf{x}'_1, h_{\mathbf{w}}^n(\mathbf{x}_1)), \dots, (\mathbf{x}'_{n^{cd}}, h_{\mathbf{w}}^n(\mathbf{x}_{n^{cd}}))\}$  where for every vector  $\mathbf{x} \in \mathbb{R}^n$ , the vector  $\mathbf{x}' \in \mathbb{R}^{\tilde{n}}$  is obtained from  $\mathbf{x}$  by padding it with zeros. Thus,  $\mathbf{x}' = (\mathbf{x}, 0, \dots, 0)$ . Note that  $n^{cd} > \tilde{n}^d$ . Also, note

that for every  $i$  we have  $h_{\mathbf{w}}^n(\mathbf{x}_i) = h_{\mathbf{w}}^{\tilde{n}}(\mathbf{x}'_i)$ . Hence,  $S'$  is realizable by the CNN  $h_{\mathbf{w}}^{\tilde{n}}$ . Now, given  $S$ , the algorithm  $\mathcal{L}$  runs  $\mathcal{L}'$  on  $S'$  and returns an hypothesis  $h(\mathbf{x}) = \mathcal{L}'(S')(\mathbf{x}')$ .

Therefore, if learning  $\mathcal{D}_{\text{vec}}$ -random CNNs with input dimension  $n = \mathcal{O}(t \log^2(t))$  is hard already if the distribution  $\mathcal{D}$  is over vectors of norm at most  $g(n)$ , then learning  $\mathcal{D}_{\text{vec}}$ -random CNNs with input dimension  $\tilde{n} = t^c$  is hard already if the distribution  $\mathcal{D}$  is over vectors of norm at most  $g(n) < g(t^2) = g(\tilde{n}^{\frac{2}{c}})$ . Hence we have the following corollaries.

**Corollary C.1.** *Let  $\mathcal{D}_{\text{vec}}$  be a distribution over  $\mathbb{R}^t$  such that each component is drawn i.i.d. from a distribution  $\mathcal{D}_z$  over  $\mathbb{R}$ . Let  $n = t^c$  for some integer  $c > 1$ , and let  $\epsilon = \frac{3}{c}$ .*

1. *If  $\mathcal{D}_z = \mathcal{U}([-r, r])$ , then learning a  $\mathcal{D}_{\text{vec}}$ -random CNN  $h_{\mathbf{w}}^n$  (with  $\mathcal{O}(n)$  hidden neurons) is RSAT-hard, already if  $\mathcal{D}$  is over vectors of norm at most  $\frac{n^\epsilon}{r}$ .*
2. *If  $\mathcal{D}_z = \mathcal{N}(0, \sigma^2)$ , then learning a  $\mathcal{D}_{\text{vec}}$ -random CNN  $h_{\mathbf{w}}^n$  (with  $\mathcal{O}(n)$  hidden neurons) is RSAT-hard, already if  $\mathcal{D}$  is over vectors of norm at most  $\frac{n^\epsilon}{\sigma}$ .*

**Corollary C.2.** *Let  $\Sigma$  be a positive definite matrix of size  $t \times t$ , and let  $\lambda_{\min}$  be its minimal eigenvalue. Let  $n = t^c$  for some integer  $c > 1$ , and let  $\epsilon = \frac{3}{c}$ . Then, learning a  $\mathcal{N}(\mathbf{0}, \Sigma)$ -random CNN  $h_{\mathbf{w}}^n$  (with  $\mathcal{O}(n)$  hidden neurons) is RSAT-hard, already if the distribution  $\mathcal{D}$  is over vectors of norm at most  $\frac{n^\epsilon}{\sqrt{\lambda_{\min}}}$ .*

**Corollary C.3.** *Let  $\mathcal{D}_{\text{vec}}$  be the uniform distribution over the sphere of radius  $r$  in  $\mathbb{R}^t$ . Let  $n = t^c$  for some integer  $c > 1$ , and let  $\epsilon = \frac{2}{c}$ . Then, learning a  $\mathcal{D}_{\text{vec}}$ -random CNN  $h_{\mathbf{w}}^n$  (with  $\mathcal{O}(n)$  hidden neurons) is RSAT-hard, already if the distribution  $\mathcal{D}$  is over vectors of norm at most  $\frac{n^\epsilon}{r}$ .*

As an example, consider a CNN  $h_{\mathbf{w}}^n$  with  $n = t^c$ . Note that since the patch size is  $t$ , then each hidden neuron has  $t$  input neurons feeding into it. Consider a distribution  $\mathcal{D}_{\text{vec}}$  over  $\mathbb{R}^t$  such that each component is drawn i.i.d. by a normal distribution with  $\sigma = \frac{1}{\sqrt{t}}$ . This distribution corresponds to the standard Xavier initialization. Then, by Corollary C.1, learning a  $\mathcal{D}_{\text{vec}}$ -random CNN  $h_{\mathbf{w}}^n$  is RSAT-hard, already if  $\mathcal{D}$  is over vectors of norm at most  $n^{\frac{3}{c}} \sqrt{t} = n^{\frac{3}{c}} \cdot n^{\frac{1}{2c}}$ . By choosing an appropriate  $c$ , we have that learning a  $\mathcal{D}_{\text{vec}}$ -random CNN  $h_{\mathbf{w}}^n$  is RSAT-hard, already if  $\mathcal{D}$  is over vectors of norm at most  $\sqrt{n}$ .

Finally, note that Corollary 3.4 holds also for the values of  $n$  and the bounds on the support of  $\mathcal{D}$  from Corollaries C.1, C.2 and C.3.
